# Supplementary material for: Genetic and Pharmacological Manipulations of Glyoxalase 1 Mediate Ethanol Withdrawal Seizure Susceptibility in Mice
Source: MDPI journal article supplement (doi:10.3390/brainsci11010127), 2021-01-19
Supplement: s1 [file s1]

**Supplemental Table S1:** Number of animals per maximum HIC score for each experiment

|                                | Group    | No HICs (0) | 1 | 2 | 3 | 4 |
|--------------------------------|----------|-------------|---|---|---|---|
| <b>Experiment 1</b>            | WT       | 5           | 3 | 0 | 0 | 0 |
|                                | TG (B6)  | 3           | 4 | 1 | 0 | 0 |
| <b>Experiment 2</b>            | WT       | 1           | 1 | 6 | 1 | 0 |
|                                | TG (FVB) | 0           | 0 | 7 | 3 | 2 |
| <b>Experiment 3 (1 cycle)</b>  | Vehicle  | 7           | 6 | 0 | 0 | 0 |
|                                | pBBG     | 9           | 2 | 0 | 0 | 0 |
| <b>Experiment 3 (2 cycles)</b> | Vehicle  | 6           | 7 | 0 | 0 | 0 |
|                                | pBBG     | 10          | 1 | 0 | 0 | 0 |

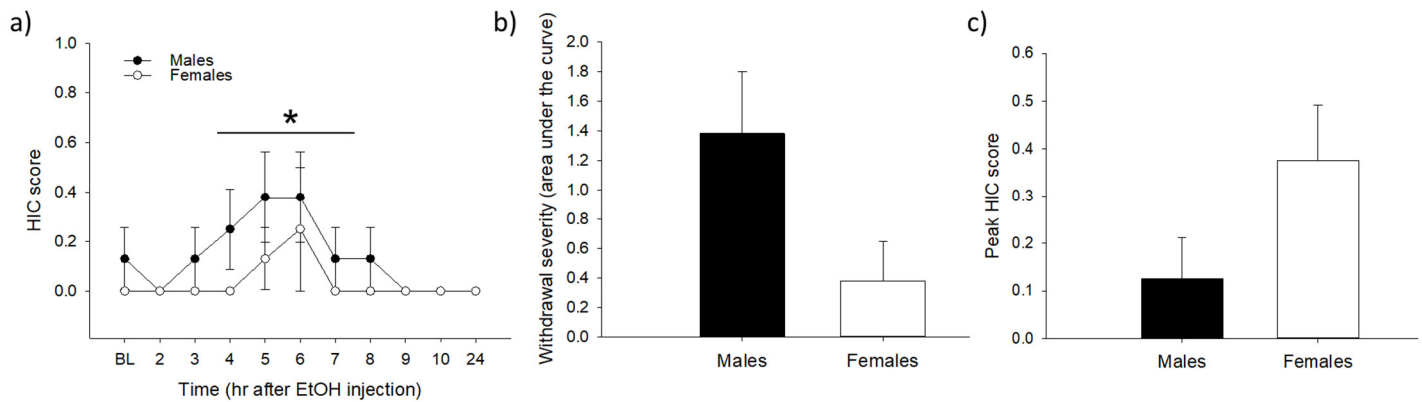

**Figure S1.** Acute ethanol withdrawal measures for male and female mice from Experiment 1 collapsed on genotype. Panel **a** shows time course of withdrawal, with baseline HIC measurements made immediately before ethanol injection. There was a main effect of sex, with male mice having higher HIC scores across the time course than female mice. Panel **b** shows cumulative HIC scores (area under the curve, AUC) for each sex. There was a non-significant increase in HIC AUC in males compared to females ( $p=0.064$ ). Panel **c** shows peak HIC score for each sex.  $N=8/\text{genotype}$ . \*  $p<0.05$
